# Supplementary material
Source: PubMed Central journal article supplement (PMC4297503)
Supplement: NIHMS627782-supplement-1.pdf [file NIHMS627782-supplement-1.pdf]

## **SUPPLEMENTARY INFORMATION**

Supplementary video 1: Complete stacks of confocal imaging sections of *HAMI* transcriptional reporter (green) in *L-er* inflorescence meristem with cellular outlines (red) stained with propidium iodide (PI), from bottom to the top, showing that *HAMI* is expressed in rib meristem and peripheral zones but not in the L1 or L2 in the central zone.
